# Supplementary material for: Synthesis and characterization of a new rare earth borate nonlinear optical crystal K7PbLu2B15O30
Source: Royal Society of Chemistry journal article supplement (doi:10.1039/d3dt01740k), 2023-01-01
Supplement: d3dt01740k1.pdf [file d3dt01740k1.pdf]

## **Synthesis and Characterizations of a New Rare Earth Borate Nonlinear Optical Crystal $K_7PbLu_2B_{15}O_{30}$**

Juhe Liu,<sup>a,c,d</sup> Yuwei Chen,<sup>a,b,d</sup> Mengran Sun,<sup>a,b,d</sup> Wenhao Liu,<sup>a,b,d</sup>, Xianghe Meng,<sup>a,d\*</sup> and Jiyong Yao<sup>a,b\*</sup>

<sup>a</sup> Beijing Center for Crystal Research and Development, Key Lab of Functional Crystals and Laser Technology, Technical Institute of Physics and Chemistry, Chinese Academy of Sciences, Beijing 100190, P. R. China.

<sup>b</sup> Center of Materials Science and Optoelectronics Engineering, University of Chinese Academy of Sciences, Beijing 100049, P. R. China.

<sup>c</sup> School of Future Technology, University of Chinese Academy of Sciences, Beijing, 100049, China

<sup>d</sup> University of Chinese Academy of Sciences, Beijing 100049, P. R. China.

\*Corresponding author:

Jiyong Yao; [jyao@mail.ipc.ac.cn](mailto:jyao@mail.ipc.ac.cn)

Xianghe Meng; [mengxianghe@mail.ipc.ac.cn](mailto:mengxianghe@mail.ipc.ac.cn)

Table S1 Selected Bond Lengths for  $K_7PbLu_2B_{15}O_{30}$

| Atom | Atom             | Length/Å  | Atom | Atom             | Length/Å |
|------|------------------|-----------|------|------------------|----------|
| Lu1  | O1               | 2.182(6)  | K1   | O5 <sup>2</sup>  | 2.705(6) |
| Lu1  | O1 <sup>2</sup>  | 2.182(6)  | K1   | O5 <sup>17</sup> | 2.705(6) |
| Lu1  | O1 <sup>3</sup>  | 2.182(6)  | K1   | O5 <sup>18</sup> | 2.705(6) |
| Lu1  | O4 <sup>4</sup>  | 2.296(7)  | K1   | O5 <sup>16</sup> | 2.706(6) |
| Lu1  | O4 <sup>5</sup>  | 2.295(7)  | K1   | O5               | 2.706(6) |
| Lu1  | O4 <sup>6</sup>  | 2.296(7)  | K2   | O1 <sup>16</sup> | 2.843(6) |
| Pb1  | O4               | 2.503(7)  | K2   | O1 <sup>19</sup> | 2.843(6) |
| Pb1  | O4 <sup>11</sup> | 2.503(7)  | K2   | O2 <sup>19</sup> | 3.211(8) |
| Pb1  | O4 <sup>12</sup> | 2.503(7)  | K2   | O2 <sup>16</sup> | 3.211(8) |
| Pb1  | O4 <sup>13</sup> | 2.503(7)  | K2   | O3 <sup>20</sup> | 2.931(7) |
| Pb1  | O4 <sup>14</sup> | 2.503(7)  | K2   | O3 <sup>2</sup>  | 2.931(7) |
| Pb1  | O4 <sup>15</sup> | 2.503(7)  | K2   | O5 <sup>20</sup> | 2.778(6) |
| B1   | O3 <sup>16</sup> | 1.454(11) | K2   | O5 <sup>2</sup>  | 2.778(6) |
| B1   | O5 <sup>16</sup> | 1.473(11) | K3   | O1 <sup>19</sup> | 2.797(6) |
| B3   | O4 <sup>16</sup> | 1.346(13) | K3   | O1 <sup>22</sup> | 2.797(6) |
| B2   | O5 <sup>16</sup> | 1.370(12) | K3   | O2 <sup>19</sup> | 3.222(7) |
| B2   | O1               | 1.329(12) | K3   | O2 <sup>22</sup> | 2.222(7) |
| B2   | O2               | 1.399(12) | K3   | O3 <sup>23</sup> | 2.837(8) |
| B3   | O2               | 1.413(12) | K3   | O3 <sup>11</sup> | 2.837(8) |
| B3   | O3               | 1.358(15) | K3   | O4 <sup>17</sup> | 2.939(7) |
| K1   | O5 <sup>3</sup>  | 2.705(6)  | K3   | O4               | 2.939(7) |

注：<sup>2</sup>-1-Y, +X-Y, +Z; <sup>3</sup>-1+Y-X, -1-X, +Z; <sup>4</sup>1/3-Y+X, -1/3-Y, 2/3-Z; <sup>5</sup>-2/3+Y, 2/3+X, 2/3-Z;  
<sup>6</sup>-5/3-X, -4/3-X+Y, 2/3-Z; <sup>9</sup>2/3+X, 1/3+Y, 1/3+Z; <sup>11</sup>-2+Y-X, -1-X, +Z; <sup>12</sup>-2-X, -1-X+Y,  
-Z; <sup>13</sup>-1-Y, 1+X-Y, +Z; <sup>14</sup>-1+Y, 1+X, -Z; <sup>15</sup>-Y+X, -Y, -Z; <sup>16</sup>-4/3-X, -2/3-X+Y, 1/3-Z;  
<sup>17</sup>-1/3-Y+X, -2/3-Y, 1/3-Z; <sup>20</sup>-1+Y, +X, -Z; <sup>23</sup>-4/3+Y, 1/3+X, 1/3-Z.

Table S2 Selected Bond Angles for  $K_7PbLu_2B_{15}O_{30}$

| Atom             | Atom | Atom             | Angle/°   | Atom             | Atom | Atom | Angle/°   |
|------------------|------|------------------|-----------|------------------|------|------|-----------|
| O3 <sup>6</sup>  | B1   | O3               | 109.2(11) | O3               | B3   | O2   | 118.4(9)  |
| O3 <sup>16</sup> | B1   | O5 <sup>16</sup> | 108.7(3)  | O4 <sup>16</sup> | B3   | O3   | 121.8(9)  |
| O3               | B1   | O5               | 108.7(3)  | O4 <sup>16</sup> | B3   | O2   | 119.7(11) |
| O3               | B1   | O5 <sup>16</sup> | 111.4(3)  | B2               | O2   | B3   | 121.3(8)  |

|                  |    |                  |           |                  |    |                  |          |
|------------------|----|------------------|-----------|------------------|----|------------------|----------|
| O3 <sup>16</sup> | B1 | O5               | 111.4(3)  | B3               | O3 | B1               | 125.5(7) |
| O5 <sup>16</sup> | B1 | O5               | 107.5(11) | B2               | O1 | Lu1              | 143.5(6) |
| O1               | B2 | O2               | 117.8(9)  | B3 <sup>16</sup> | O4 | Lu1 <sup>9</sup> | 131.7(7) |
| O1               | B2 | O5 <sup>16</sup> | 123.4(8)  | B2 <sup>16</sup> | O5 | B1               | 124.3(6) |
| O5 <sup>16</sup> | B2 | O2               | 118.8(8)  |                  |    |                  |          |

注: <sup>9</sup>-2/3+Y, 2/3+X, 2/3-Z; <sup>16</sup>-4/3-X, -2/3-X+Y, 1/3-Z

**Table S3 Anisotropic Displacement Parameters ( $\text{\AA}^2 \times 10^3$ ) for  $\text{K}_7\text{PbLu}_2\text{B}_{15}\text{O}_{30}$**

| Atom | U <sub>11</sub> | U <sub>22</sub> | U <sub>33</sub> | U <sub>23</sub> | U <sub>13</sub> | U <sub>12</sub> |
|------|-----------------|-----------------|-----------------|-----------------|-----------------|-----------------|
| Lu   | 12.6(2)         | 12.6(2)         | 10.5(3)         | 0               | 0               | 6.3(1)          |
| Pb   | 26.3(3)         | 26.3(3)         | 16.8(3)         | 0               | 0               | 13.17(13)       |
| O1   | 23(4)           | 21(3)           | 21(3)           | 6(2)            | 0(2)            | 14(3)           |
| O2   | 30(5)           | 25(4)           | 41(4)           | 10(3)           | -17(3)          | 3(3)            |
| O3   | 29(4)           | 17(3)           | 24(3)           | 2(3)            | -6(3)           | 10(3)           |
| O4   | 25(4)           | 32(5)           | 44(4)           | -9(3)           | -4(3)           | 18(4)           |
| O5   | 21(3)           | 25(3)           | 17(3)           | -5(3)           | -1(3)           | 14(3)           |
| B1   | 27(8)           | 23(5)           | 16(7)           | -1(3)           | -3(6)           | 13(4)           |
| B2   | 18(7)           | 17(4)           | 19(4)           | -4(3)           | 3(4)            | 7(4)            |
| B3   | 30(8)           | 17(4)           | 28(4)           | -2(3)           | -3(6)           | 16(5)           |
| K1   | 18.6(11)        | 18.6(11)        | 43(3)           | 0               | 0               | 9.3(6)          |
| K2   | 22.4(15)        | 32.4(12)        | 26.0(15)        | -1.4(6)         | -2.7(12)        | 11.2(8)         |
| K3   | 21.0(17)        | 29.4(13)        | 36.3(14)        | -14.3(11)       | -7.2(6)         | 14.7(7)         |

**Table S4 Atomic Coordinates ( $\times 10^4$ ) and Equivalent Isotropic Displacement Parameters ( $\text{\AA}^2 \times 10^3$ ) for  $\text{K}_7\text{PbLu}_2\text{B}_{15}\text{O}_{30}$ .**

| Atom | x        | y        | z         | U(eq)     |
|------|----------|----------|-----------|-----------|
| Lu1  | -6667    | -3333    | 4400.6(3) | 11.89(17) |
| Pb1  | -10000   | 0        | 0         | 23.2(2)   |
| O1   | -5643(5) | -1696(5) | 3669(4)   | 20.7(16)  |
| O2   | -4733(6) | 76(6)    | 2888(5)   | 37(2)     |
| O3   | -5623(6) | 354(5)   | 1616(4)   | 23.7(14)  |
| O4   | -9553(6) | -987(6)  | 1228(5)   | 32.1(18)  |
| O5   | -6700(5) | -1493(6) | 888(4)    | 20.5(13)  |

|    |           |          |         |         |
|----|-----------|----------|---------|---------|
| B1 | -6667     | -811(12) | 1667    | 22(3)   |
| B2 | -5695(10) | -1058(8) | 3010(6) | 19(3)   |
| B3 | -4707(14) | 801(8)   | 2191(7) | 23(3)   |
| K1 | -6667     | -3333    | 1667    | 26.8(9) |
| K2 | -10000    | -4625(3) | 0       | 28.1(7) |
| K3 | -11532(3) | -3333    | 1667    | 28.0(8) |

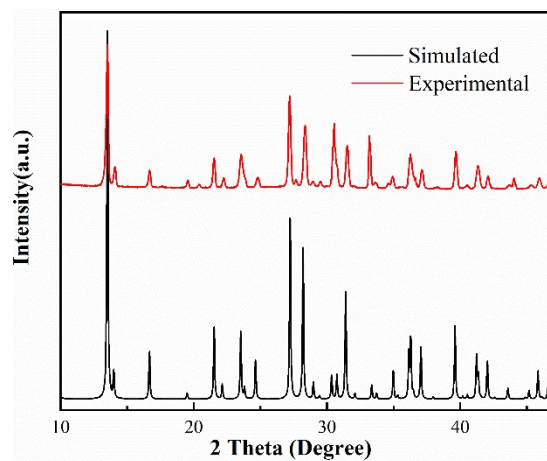

**Fig. S1 Comparison of experimental polycrystalline powder and theoretically simulated PXRD patterns of  $K_7PbLu_2B_{15}O_{30}$**

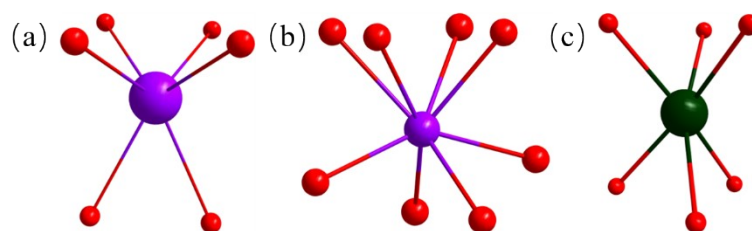

**Fig. S2 (a)  $KO_6$ , (b)  $KO_8$ , and (c)  $PbO_6$  groups.**

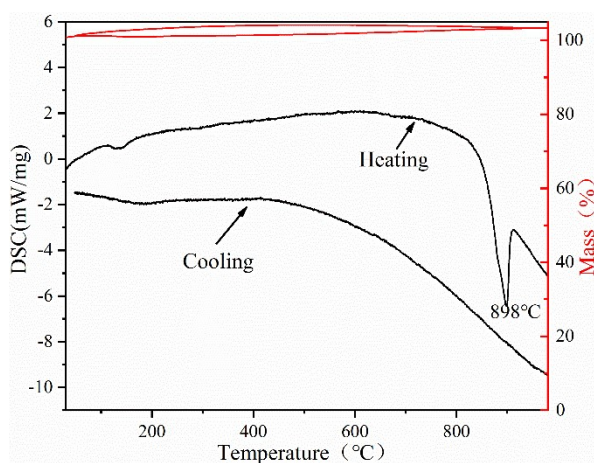

**Fig. S3 DSC and TG curves of  $K_7PbLu_2B_{15}O_{30}$**

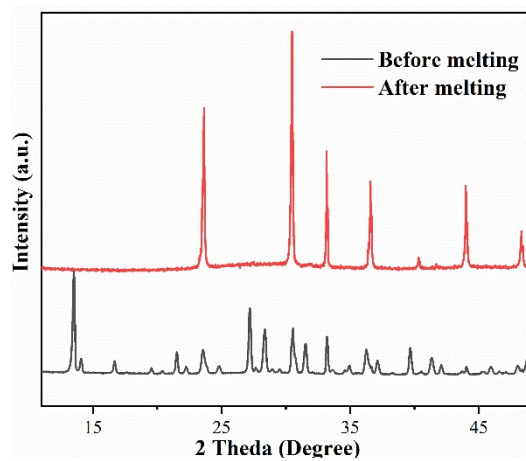

Fig. S4 Comparison diagram of XRD before and after melting of compound  $K_7PbLu_2B_{15}O_{30}$

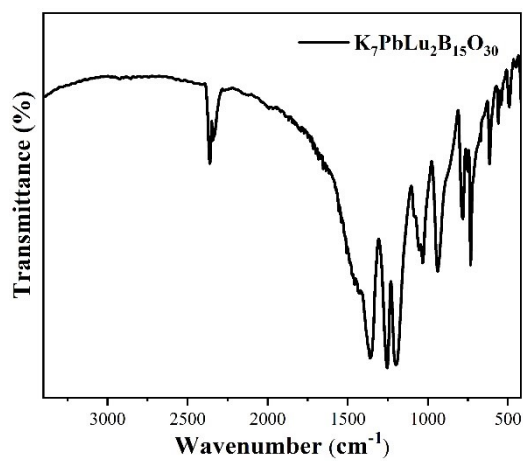

Fig. S5 IR spectra for  $K_7PbLu_2B_{15}O_{30}$
